# Supplementary material for: Extensive new Anopheles cryptic species involved in human malaria transmission in western Kenya
Source: PubMed Central journal article supplement (PMC7527330; doi:10.1038/s41598-020-73073-5), 2020-09-30
Supplement: 41598_2020_73073_MOESM1_ESM.pdf [file 41598_2020_73073_MOESM1_ESM.pdf]

*Supplementary Data file*

**Extensive New *Anopheles* Cryptic Species Involved in Human Malaria Transmission  
in Western Kenya**

Daibin Zhong<sup>1\*</sup>, Elizabeth Hemming-Schroeder<sup>1</sup>, Xiaoming Wang<sup>1</sup>, Solomon Kibret<sup>1</sup>,  
Guofa Zhou<sup>1</sup>, Harrysone Atieli<sup>2</sup>, Ming-Chieh Lee<sup>1</sup>, Yaw A. Afrane<sup>3</sup>, Andrew K.  
Githeko<sup>2</sup>, and Guiyun Yan<sup>1\*</sup>

<sup>1</sup> Program in Public Health, College of Health Sciences, University of California at  
Irvine, Irvine, California 92697, USA

<sup>2</sup> Centre for Global Health Research, Kenya Medical Research Institute, Kisumu, Kenya

<sup>3</sup> Department of Medical Microbiology, College of Health Sciences, University of  
Ghana, Ghana

[\\*dzhong@uci.edu](mailto:dzhong@uci.edu); [guiyuny@uci.edu](mailto:guiyuny@uci.edu)

**Supplementary Table S1 Pairwise comparison of ITS2 sequence similarities of the 21 *Anopheles* species identified in western Kenya**

| Species  | AR   | CF   | CH   | CO   | FUN  | GA   | LEE  | MA   | PH   | PR   | RU   | An.sp.1 | An.sp.6 | An.sp.7 | An.sp.9 | An.sp.11 | An.sp.14 | An.sp.15 | An.sp.17 | An.sp.18 | An.sp.19 |  |
|----------|------|------|------|------|------|------|------|------|------|------|------|---------|---------|---------|---------|----------|----------|----------|----------|----------|----------|--|
| AR       | -    |      |      |      |      |      |      |      |      |      |      |         |         |         |         |          |          |          |          |          |          |  |
| CF       | 0.46 | -    |      |      |      |      |      |      |      |      |      |         |         |         |         |          |          |          |          |          |          |  |
| CH       | 0.74 | 0.48 | -    |      |      |      |      |      |      |      |      |         |         |         |         |          |          |          |          |          |          |  |
| CO       | 0.34 | 0.33 | 0.34 | -    |      |      |      |      |      |      |      |         |         |         |         |          |          |          |          |          |          |  |
| FUN      | 0.31 | 0.38 | 0.30 | 0.32 | -    |      |      |      |      |      |      |         |         |         |         |          |          |          |          |          |          |  |
| GA       | 0.99 | 0.45 | 0.75 | 0.33 | 0.31 | -    |      |      |      |      |      |         |         |         |         |          |          |          |          |          |          |  |
| LEE      | 0.46 | 0.66 | 0.47 | 0.32 | 0.36 | 0.46 | -    |      |      |      |      |         |         |         |         |          |          |          |          |          |          |  |
| MA       | 0.53 | 0.45 | 0.54 | 0.30 | 0.29 | 0.53 | 0.44 | -    |      |      |      |         |         |         |         |          |          |          |          |          |          |  |
| PH       | 0.23 | 0.20 | 0.22 | 0.22 | 0.25 | 0.24 | 0.20 | 0.19 | -    |      |      |         |         |         |         |          |          |          |          |          |          |  |
| PR       | 0.53 | 0.46 | 0.54 | 0.31 | 0.28 | 0.53 | 0.44 | 0.84 | 0.20 | -    |      |         |         |         |         |          |          |          |          |          |          |  |
| RU       | 0.52 | 0.47 | 0.52 | 0.29 | 0.30 | 0.52 | 0.45 | 0.77 | 0.19 | 0.74 | -    |         |         |         |         |          |          |          |          |          |          |  |
| An.sp.1  | 0.46 | 0.56 | 0.46 | 0.31 | 0.38 | 0.45 | 0.51 | 0.47 | 0.20 | 0.48 | 0.45 | -       |         |         |         |          |          |          |          |          |          |  |
| An.sp.6  | 0.46 | 0.59 | 0.48 | 0.33 | 0.37 | 0.46 | 0.56 | 0.47 | 0.20 | 0.48 | 0.50 | 0.72    | -       |         |         |          |          |          |          |          |          |  |
| An.sp.7  | 0.46 | 0.57 | 0.45 | 0.34 | 0.37 | 0.46 | 0.55 | 0.47 | 0.20 | 0.47 | 0.49 | 0.71    | 0.88    | -       |         |          |          |          |          |          |          |  |
| An.sp.9  | 0.47 | 0.58 | 0.46 | 0.35 | 0.37 | 0.47 | 0.57 | 0.48 | 0.21 | 0.49 | 0.50 | 0.71    | 0.87    | 0.89    | -       |          |          |          |          |          |          |  |
| An.sp.11 | 0.20 | 0.18 | 0.19 | 0.18 | 0.22 | 0.20 | 0.17 | 0.19 | 0.49 | 0.19 | 0.18 | 0.17    | 0.19    | 0.19    | 0.18    | -        |          |          |          |          |          |  |
| An.sp.14 | 0.46 | 0.58 | 0.46 | 0.34 | 0.38 | 0.45 | 0.57 | 0.48 | 0.20 | 0.48 | 0.49 | 0.71    | 0.84    | 0.81    | 0.80    | 0.20     |          |          |          |          |          |  |
| An.sp.15 | 0.33 | 0.32 | 0.34 | 0.90 | 0.33 | 0.33 | 0.30 | 0.29 | 0.21 | 0.30 | 0.29 | 0.30    | 0.33    | 0.33    | 0.34    | 0.18     | 0.33     | -        |          |          |          |  |
| An.sp.17 | 0.46 | 0.59 | 0.46 | 0.31 | 0.39 | 0.46 | 0.58 | 0.48 | 0.19 | 0.47 | 0.49 | 0.68    | 0.76    | 0.75    | 0.77    | 0.19     | 0.72     | 0.31     | -        |          |          |  |
| An.sp.18 | 0.29 | 0.27 | 0.29 | 0.85 | 0.27 | 0.29 | 0.28 | 0.27 | 0.21 | 0.27 | 0.26 | 0.26    | 0.29    | 0.30    | 0.31    | 0.17     | 0.30     | 0.81     | 0.27     | -        |          |  |
| An.sp.19 | 0.40 | 0.48 | 0.39 | 0.27 | 0.32 | 0.40 | 0.45 | 0.40 | 0.20 | 0.41 | 0.39 | 0.78    | 0.64    | 0.63    | 0.63    | 0.19     | 0.64     | 0.26     | 0.59     | 0.29     | -        |  |

AR, *An.arabiensis*; CF, *An.cf.rivulorum*; CH, *An.christyi*; CO, *An.coustani*; FUN, *An.funestus*; GA, *An.gambiae*; LEE, *An.leesoni*; MA, *An.maculipalpis*; PH, *An.pharoensis*; PR, *An.pretoriensis*; RU, *An.rufipes*.

**Supplementary Table S2.** GenBank accession numbers of ITS2 sequences identified in the 21 *Anopheles* species in western Kenya

| Sequence_ID | Species                 | Isolate | GenBank accession |
|-------------|-------------------------|---------|-------------------|
| Seq1        | <i>An. gambiae</i>      | KH01    | MT408564          |
| Seq2        | <i>An. arabiensis</i>   | KH02    | MT408565          |
| Seq3        | <i>An. funestus</i>     | KH03    | MT408566          |
| Seq4        | <i>An. cf.rivulorum</i> | KH04    | MT408567          |
| Seq5        | <i>An. christyi</i>     | KH05    | MT408568          |
| Seq6        | <i>An. coustani</i>     | KH06    | MT408569          |
| Seq7        | <i>An. lesoni</i>       | KH07    | MT408570          |
| Seq8        | <i>An. maculipalpis</i> | KH08    | MT408571          |
| Seq9        | <i>An. pharoensis</i>   | KH09    | MT408572          |
| Seq10       | <i>An. pretoriensis</i> | KH10    | MT408573          |
| Seq11       | <i>An. rufipes</i>      | KH11    | MT408574          |
| Seq12       | <i>An. sp.1</i>         | KH12    | MT408575          |
| Seq13       | <i>An. sp.6</i>         | KH13    | MT408576          |
| Seq14       | <i>An. sp.7</i>         | KH14    | MT408577          |
| Seq15       | <i>An. sp.9</i>         | KH15    | MT408578          |
| Seq16       | <i>An. sp.11</i>        | KH16    | MT408579          |
| Seq17       | <i>An. sp.14</i>        | KH17    | MT408580          |
| Seq18       | <i>An. sp.15</i>        | KH18    | MT408581          |
| Seq19       | <i>An. sp.17</i>        | KH19    | MT408582          |
| Seq20       | <i>An. sp.18</i>        | KH20    | MT408583          |
| Seq21       | <i>An. sp.19</i>        | KH21    | MT408584          |

**Supplementary Table S3.** GenBank accession numbers of COX1 haplotype sequences identified in *Anopheles* species of western Kenya

| Sequence_ID | Species                 | Haplotype | GenBank accession |
|-------------|-------------------------|-----------|-------------------|
| >Seq1       | <i>An. sp.17</i>        | H01       | MT375202          |
| >Seq2       | <i>An. sp.17</i>        | H02       | MT375203          |
| >Seq3       | <i>An. sp.17</i>        | H03       | MT375204          |
| >Seq4       | <i>An. sp.17</i>        | H04       | MT375205          |
| >Seq5       | <i>An. sp.17</i>        | H05       | MT375206          |
| >Seq6       | <i>An. sp.17</i>        | H06       | MT375207          |
| >Seq7       | <i>An. sp.17</i>        | H07       | MT375208          |
| >Seq8       | <i>An. sp.17</i>        | H08       | MT375209          |
| >Seq9       | <i>An. sp.17</i>        | H09       | MT375210          |
| >Seq10      | <i>An. sp.17</i>        | H10       | MT375211          |
| >Seq11      | <i>An. sp.17</i>        | H11       | MT375212          |
| >Seq12      | <i>An. sp.17</i>        | H12       | MT375213          |
| >Seq13      | <i>An. sp.17</i>        | H13       | MT375214          |
| >Seq14      | <i>An. funestus</i>     | H01       | MT375215          |
| >Seq15      | <i>An. funestus</i>     | H02       | MT375216          |
| >Seq16      | <i>An. funestus</i>     | H03       | MT375217          |
| >Seq17      | <i>An. funestus</i>     | H04       | MT375218          |
| >Seq18      | <i>An. funestus</i>     | H05       | MT375219          |
| >Seq19      | <i>An. funestus</i>     | H06       | MT375220          |
| >Seq20      | <i>An. gambiae</i>      | H01       | MT375221          |
| >Seq21      | <i>An. gambiae</i>      | H02       | MT375222          |
| >Seq22      | <i>An. gambiae</i>      | H03       | MT375223          |
| >Seq23      | <i>An. gambiae</i>      | H04       | MT375224          |
| >Seq24      | <i>An. sp.6</i>         | H01       | MT375225          |
| >Seq25      | <i>An. sp.9</i>         | H01       | MT375226          |
| >Seq26      | <i>An. cf.rivulorum</i> | H01       | MT375227          |
| >Seq27      | <i>An. maculipalpis</i> | H01       | MT375228          |
| >Seq28      | <i>An. maculipalpis</i> | H02       | MT375229          |

Supplementary Table S4 Number of *Plasmodium* positive mosquitoes detected indoor and outdoor in western Kenya highlands.

| Species                 | Iguhu (2016)   |                | Emutete (2017) |              |
|-------------------------|----------------|----------------|----------------|--------------|
|                         | Indoor         | Outdoor        | Indoor         | Outdoor      |
| <i>An. gambiae</i>      | 10(153)*       | 7(119)         | 2(32)          | 1(14)        |
| <i>An. arabiensis</i>   | 0(11)          | 0(2)           |                | 0(2)         |
| <i>An. funestus</i>     | 9(210)         | 0(14)          | 5(40)          | 1(5)         |
| <i>An. cf.rivulorum</i> | 0(1)           |                |                |              |
| <i>An. lesoni</i>       | 0(1)           |                |                |              |
| <i>An. maculipalpis</i> |                |                |                | 0(1)         |
| <i>An. rufipes</i>      | 0(2)           |                |                | 0(2)         |
| <i>An. sp.1</i>         |                | 0(1)           |                |              |
| <i>An. sp.6</i>         | 0(3)           | 0(3)           |                |              |
| <i>An. sp.7</i>         | 0(6)           | 0(1)           | 0(4)           | 0(4)         |
| <i>An. sp.9</i>         | 0(5)           | 1(5)           |                |              |
| <i>An. sp.11</i>        |                | 1(1)           |                |              |
| <i>An. sp.14</i>        | 0(1)           | 0(1)           |                |              |
| <i>An. sp.15</i>        | 0(2)           | 1(2)           |                | 0(1)         |
| <i>An. sp.17</i>        |                |                | 2(15)          | 1(7)         |
| <b>Total</b>            | <b>19(395)</b> | <b>10(149)</b> | <b>9(91)</b>   | <b>3(36)</b> |

\* The number in parenthesis represents the total number of mosquitoes tested.

Supplementary Table S5 Species component and proportion of *Plasmodium* infections detected in *Anopheles* mosquitoes in western Kenya.

| Species               | <i>pf</i> | <i>pm</i> | <i>po</i> | <i>pf+pm</i> | <i>pf+po</i> | <i>pm+po</i> | <i>pf+pm+po</i> |
|-----------------------|-----------|-----------|-----------|--------------|--------------|--------------|-----------------|
| <i>An. gambiae</i>    | 129(90.2) | 1(0.7)    | 8(5.6)    | 3(2.1)       | 2(1.4)       |              |                 |
| <i>An. arabiensis</i> | 26(86.7)  |           | 3(10.0)   | 1(3.3)       |              |              |                 |
| <i>An. funestus</i>   | 138(84.7) | 3(1.8)    | 8(4.9)    | 5(3.1)       | 7(4.3)       | 1(0.6)       | 1(0.6)          |
| <i>An. coustani</i>   | 1(100)    |           |           |              |              |              |                 |
| <i>An. rufipes</i>    | 1(100)    |           |           |              |              |              |                 |
| <i>An. sp.1</i>       | 2(100)    |           |           |              |              |              |                 |
| <i>An. sp.6</i>       | 2(100)    |           |           |              |              |              |                 |
| <i>An. sp.9</i>       | 1(100)    |           |           |              |              |              |                 |
| <i>An. sp.11</i>      | 1(100)    |           |           |              |              |              |                 |
| <i>An. sp.15</i>      | 1(100)    |           |           |              |              |              |                 |
| <i>An. sp.17</i>      | 3(100)    |           |           |              |              |              |                 |

\* The number in parenthesis represents the percentage of individuals within the mosquito species. *pf*, *P. falciparum*; *pm*, *P. malariae*; *po*, *P. ovale*.

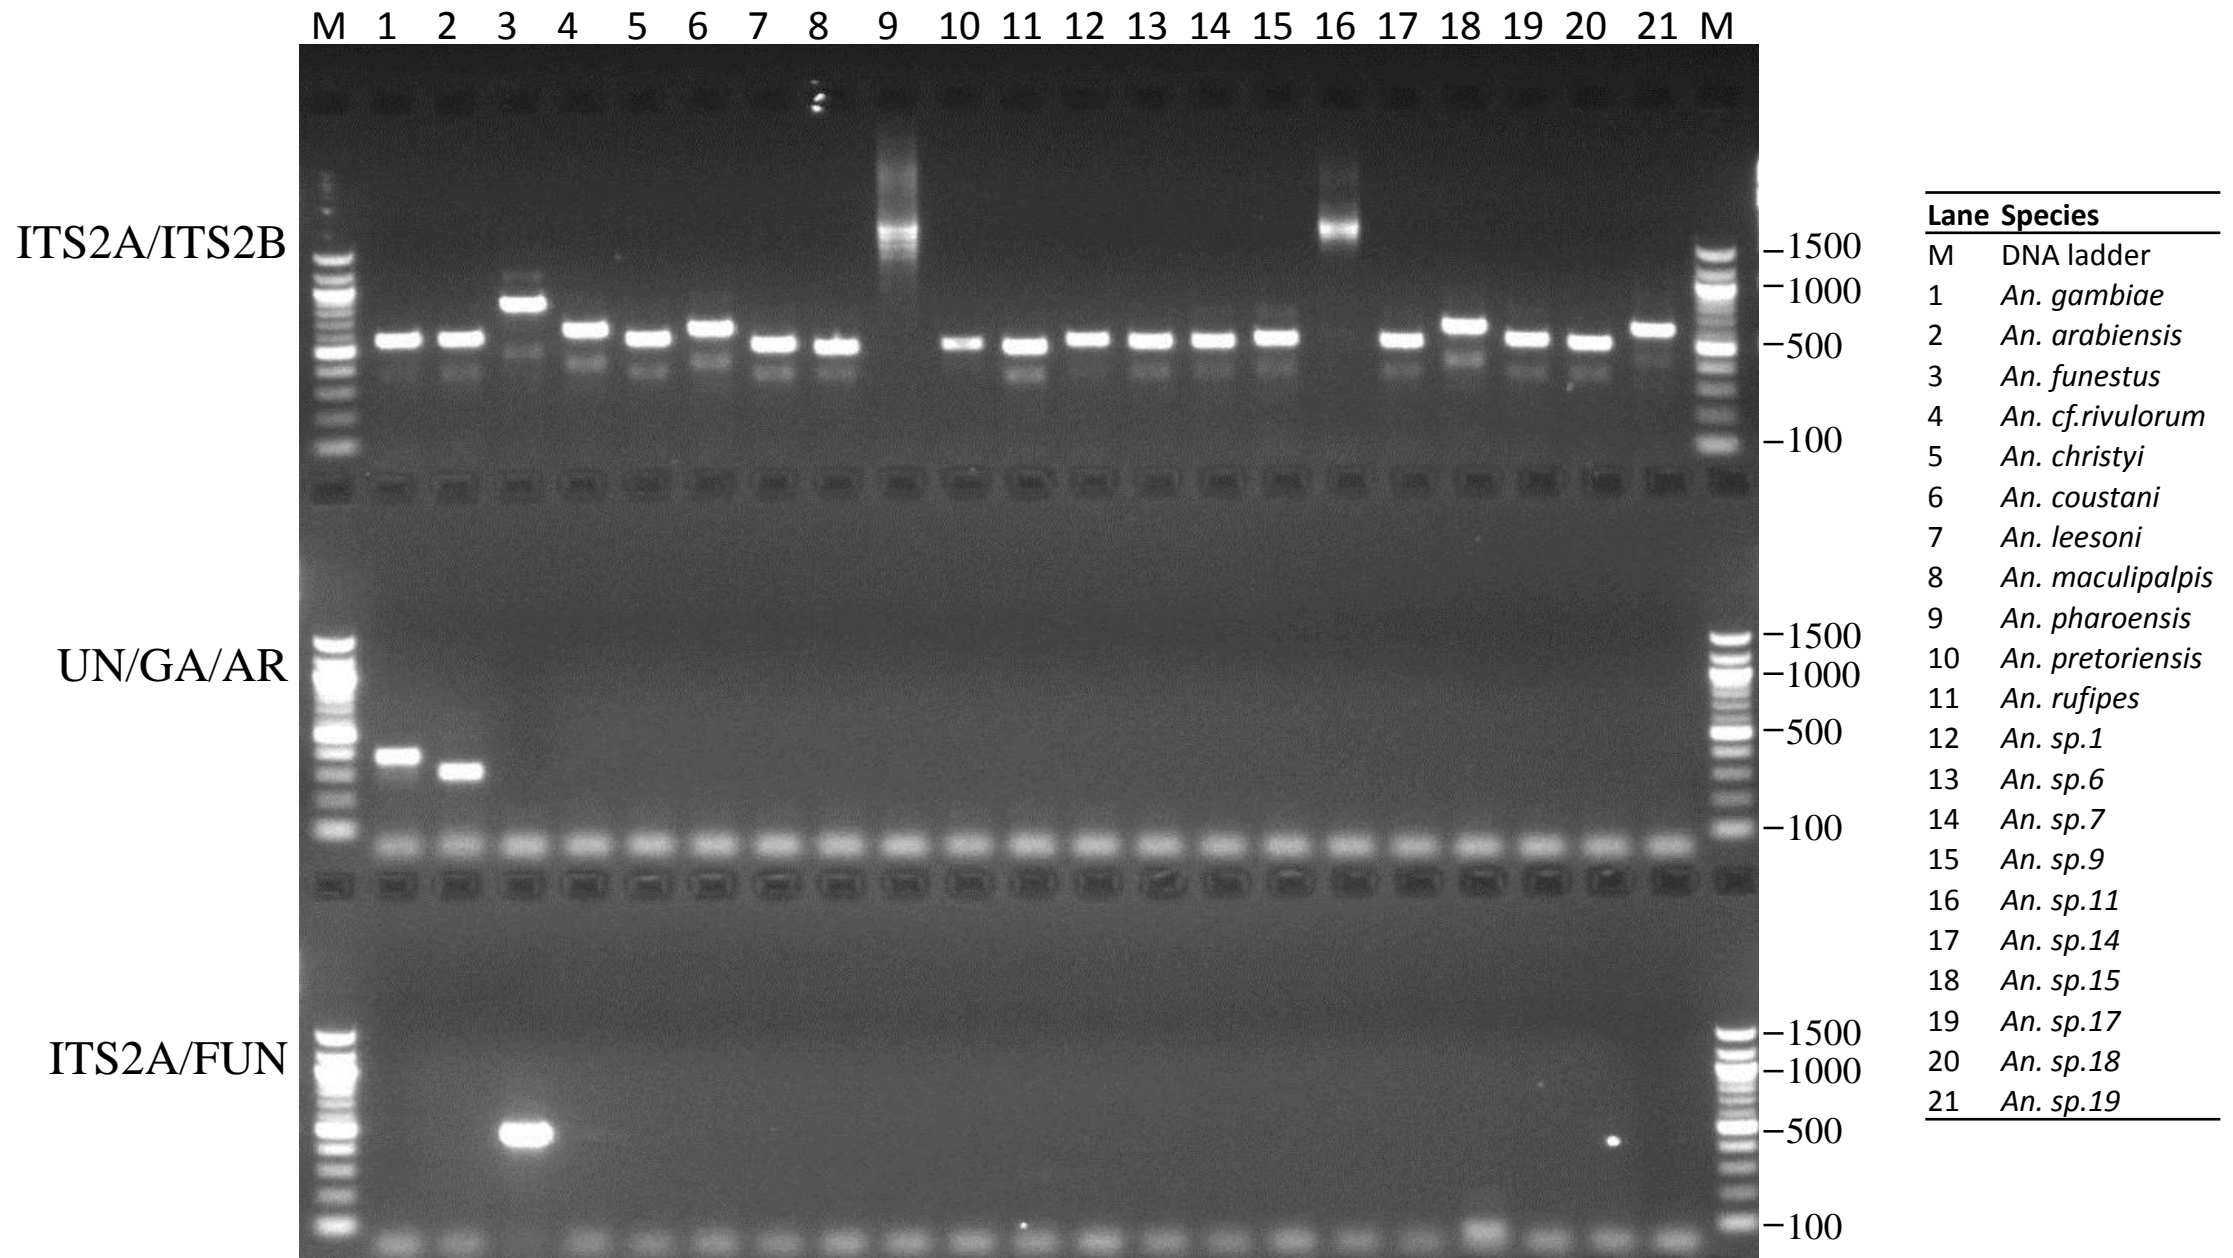

Supplementary Fig. S1 Agarose gel electrophoresis of PCR products amplified with the 21 *Anopheles* species in western Kenya. Upper panel, PCR amplification with ITS2A and ITS2B primers for sequencing; Middle panel, PCR amplification with multiplex PCR method with UN/GA/AR primers for identification of *An. gambiae* and *An. arabiensis*; Lower panel, PCR amplification with ITS2A and FUN primer for identification of *An. funestus*. Lane M, 100 bp molecular ladder; Lines 1-21, PCR results of the 21 *Anopheles* species.

Supplementary Fig. S2 shows some examples of multiple sequence alignment comparison for the similarity. (a) ITS2 sequence alignment of *An. funestus*; (b) ITS2 sequence alignment of *An. gambiae*; (c) ITS2 sequence alignment of *An. sp.17*; (d) COX1 sequence alignment of *An. funestus*; (e) COX1 sequence alignment of *An. gambiae*; (f) COX1 sequence alignment of *An. sp.17*. Multiple sequence alignments were performed using BioEdit software (<https://bioedit.software.informer.com>). The aligned sequences were reformatted by MView web-based tool (<http://wavis.img.cas.cz/>).









(d)

Reference sequence (1): An.funestus\_NC038158  
Identities normalised by aligned length.  
Colored by: identity

|                        | cov    | pid    | 1                                                                                     | 80  |
|------------------------|--------|--------|---------------------------------------------------------------------------------------|-----|
| 1 An.funestus_NC038158 | 100.0% | 100.0% | GCTGGAAATAGTAGGAACCTTCCTTAAAGAAATCCGTTATTCGAGCCGAAATAGGACATCCCGGAGCATTTATTGGAGACGATCA |     |
| 2 An.funestus_H01      | 100.0% | 99.5%  | GCTGGAAATAGTAGGAACCTTCCTTAAAGAAATCCGTTATTCGAGCCGAAATAGGACATCCCGGAGCATTTATTGGAGACGATCA |     |
| 3 An.funestus_H02      | 100.0% | 99.7%  | GCTGGAAATAGTAGGAACCTTCCTTAAAGAAATCCGTTATTCGAGCCGAAATAGGACATCCCGGAGCATTTATTGGAGACGATCA |     |
| 4 An.funestus_H03      | 100.0% | 99.4%  | GCTGGAAATAGTAGGAACCTTCCTTAAAGAAATCCGTTATTCGAGCCGAAATAGGACATCCCGGAGCATTTATTGGAGACGATCA |     |
| 5 An.funestus_H04      | 100.0% | 99.4%  | GCTGGAAATAGTAGGAACCTTCCTTAAAGAAATCCGTTATTCGAGCCGAAATAGGACATCCCGGAGCATTTATTGGAGACGATCA |     |
| 6 An.funestus_H05      | 100.0% | 99.4%  | GCTGGAAATAGTAGGAACCTTCCTTAAAGAAATCCGTTATTCGAGCCGAAATAGGACATCCCGGAGCATTTATTGGAGACGATCA |     |
| 7 An.funestus_H06      | 100.0% | 99.2%  | GCTGGAAATAGTAGGAACCTTCCTTAAAGAAATCCGTTATTCGAGCCGAAATAGGACATCCCGGAGCATTTATTGGAGACGATCA |     |
|                        | cov    | pid    | 81                                                                                    | 160 |
| 1 An.funestus_NC038158 | 100.0% | 100.0% | AAATTTATAATGTAATGTTACTGCTCATGCTTTTATTATAAATTTTTTTTATAGTAAACCATTATAATGGAGGATTTG        |     |
| 2 An.funestus_H01      | 100.0% | 99.5%  | AAATTTATAATGTAATGTTACTGCTCATGCTTTTATTATAAATTTTTTTTATAGTAAACCATTATAATGGAGGATTTG        |     |
| 3 An.funestus_H02      | 100.0% | 99.7%  | AAATTTATAATGTAATGTTACTGCTCATGCTTTTATTATAAATTTTTTTTATAGTAAACCATTATAATGGAGGATTTG        |     |
| 4 An.funestus_H03      | 100.0% | 99.4%  | AAATTTATAATGTAATGTTACTGCTCATGCTTTTATTATAAATTTTTTTTATAGTAAACCATTATAATGGAGGATTTG        |     |
| 5 An.funestus_H04      | 100.0% | 99.4%  | AAATTTATAATGTAATGTTACTGCTCATGCTTTTATTATAAATTTTTTTTATAGTAAACCATTATAATGGAGGATTTG        |     |
| 6 An.funestus_H05      | 100.0% | 99.4%  | AAATTTATAATGTAATGTTACTGCTCATGCTTTTATTATAAATTTTTTTTATAGTAAACCATTATAATGGAGGATTTG        |     |
| 7 An.funestus_H06      | 100.0% | 99.2%  | AAATTTATAATGTAATGTTACTGCTCATGCTTTTATTATAAATTTTTTTTATAGTAAACCATTATAATGGAGGATTTG        |     |
|                        | cov    | pid    | 161                                                                                   | 240 |
| 1 An.funestus_NC038158 | 100.0% | 100.0% | GAAATTTGACTTGACCTTTAATAATAGGAGCCCCGATATAGCTTTCCCGCAATAAATAAATAAAGATTTTGAATACIT        |     |
| 2 An.funestus_H01      | 100.0% | 99.5%  | GAAATTTGACTTGACCTTTAATAATAGGAGCCCCGATATAGCTTTCCCGCAATAAATAAATAAAGATTTTGAATACIT        |     |
| 3 An.funestus_H02      | 100.0% | 99.7%  | GAAATTTGACTTGACCTTTAATAATAGGAGCCCCGATATAGCTTTCCCGCAATAAATAAATAAAGATTTTGAATACIT        |     |
| 4 An.funestus_H03      | 100.0% | 99.4%  | GAAATTTGACTTGACCTTTAATAATAGGAGCCCCGATATAGCTTTCCCGCAATAAATAAATAAAGATTTTGAATACIT        |     |
| 5 An.funestus_H04      | 100.0% | 99.4%  | GAAATTTGACTTGACCTTTAATAATAGGAGCCCCGATATAGCTTTCCCGCAATAAATAAATAAAGATTTTGAATACIT        |     |
| 6 An.funestus_H05      | 100.0% | 99.4%  | GAAATTTGACTTGACCTTTAATAATAGGAGCCCCGATATAGCTTTCCCGCAATAAATAAATAAAGATTTTGAATACIT        |     |
| 7 An.funestus_H06      | 100.0% | 99.2%  | GAAATTTGACTTGACCTTTAATAATAGGAGCCCCGATATAGCTTTCCCGCAATAAATAAATAAAGATTTTGAATACIT        |     |
|                        | cov    | pid    | 241                                                                                   | 320 |
| 1 An.funestus_NC038158 | 100.0% | 100.0% | CCCTCCCTTCAATTAACCTTTACTTTCTTCTAGTAGTATAGTAGAAAAAGGAGCAGGAACAGGATGAACAGTTTATCCCCCTTT  |     |
| 2 An.funestus_H01      | 100.0% | 99.5%  | CCCTCCCTTCAATTAACCTTTACTTTCTTCTAGTAGTATAGTAGAAAAAGGAGCAGGAACAGGATGAACAGTTTATCCCCCTTT  |     |
| 3 An.funestus_H02      | 100.0% | 99.7%  | CCCTCCCTTCAATTAACCTTTACTTTCTTCTAGTAGTATAGTAGAAAAAGGAGCAGGAACAGGATGAACAGTTTATCCCCCTTT  |     |
| 4 An.funestus_H03      | 100.0% | 99.4%  | CCCTCCCTTCAATTAACCTTTACTTTCTTCTAGTAGTATAGTAGAAAAAGGAGCAGGAACAGGATGAACAGTTTATCCCCCTTT  |     |
| 5 An.funestus_H04      | 100.0% | 99.4%  | CCCTCCCTTCAATTAACCTTTACTTTCTTCTAGTAGTATAGTAGAAAAAGGAGCAGGAACAGGATGAACAGTTTATCCCCCTTT  |     |
| 6 An.funestus_H05      | 100.0% | 99.4%  | CCCTCCCTTCAATTAACCTTTACTTTCTTCTAGTAGTATAGTAGAAAAAGGAGCAGGAACAGGATGAACAGTTTATCCCCCTTT  |     |
| 7 An.funestus_H06      | 100.0% | 99.2%  | CCCTCCCTTCAATTAACCTTTACTTTCTTCTAGTAGTATAGTAGAAAAAGGAGCAGGAACAGGATGAACAGTTTATCCCCCTTT  |     |
|                        | cov    | pid    | 321                                                                                   | 400 |
| 1 An.funestus_NC038158 | 100.0% | 100.0% | ATCATCAGGAAATGTCATGCTGGTGCCTTTCAGTTGATTTAGCTATTTTTTCAATACATTTAGCAGGAAATTTCTTCTAATTT   |     |
| 2 An.funestus_H01      | 100.0% | 99.5%  | ATCATCAGGAAATGTCATGCTGGTGCCTTTCAGTTGATTTAGCTATTTTTTCAATACATTTAGCAGGAAATTTCTTCTAATTT   |     |
| 3 An.funestus_H02      | 100.0% | 99.7%  | ATCATCAGGAAATGTCATGCTGGTGCCTTTCAGTTGATTTAGCTATTTTTTCAATACATTTAGCAGGAAATTTCTTCTAATTT   |     |
| 4 An.funestus_H03      | 100.0% | 99.4%  | ATCATCAGGAAATGTCATGCTGGTGCCTTTCAGTTGATTTAGCTATTTTTTCAATACATTTAGCAGGAAATTTCTTCTAATTT   |     |
| 5 An.funestus_H04      | 100.0% | 99.4%  | ATCATCAGGAAATGTCATGCTGGTGCCTTTCAGTTGATTTAGCTATTTTTTCAATACATTTAGCAGGAAATTTCTTCTAATTT   |     |
| 6 An.funestus_H05      | 100.0% | 99.4%  | ATCATCAGGAAATGTCATGCTGGTGCCTTTCAGTTGATTTAGCTATTTTTTCAATACATTTAGCAGGAAATTTCTTCTAATTT   |     |
| 7 An.funestus_H06      | 100.0% | 99.2%  | ATCATCAGGAAATGTCATGCTGGTGCCTTTCAGTTGATTTAGCTATTTTTTCAATACATTTAGCAGGAAATTTCTTCTAATTT   |     |
|                        | cov    | pid    | 401                                                                                   | 480 |
| 1 An.funestus_NC038158 | 100.0% | 100.0% | TAGGAGCAGTAAATTTTATTACAACCTGTAATTAATATACGATCTCCGGAAATACITTTAGATCGAATACCAATATTTTGTCT   |     |
| 2 An.funestus_H01      | 100.0% | 99.5%  | TAGGAGCAGTAAATTTTATTACAACCTGTAATTAATATACGATCTCCGGAAATACITTTAGATCGAATACCAATATTTTGTCT   |     |
| 3 An.funestus_H02      | 100.0% | 99.7%  | TAGGAGCAGTAAATTTTATTACAACCTGTAATTAATATACGATCTCCGGAAATACITTTAGATCGAATACCAATATTTTGTCT   |     |
| 4 An.funestus_H03      | 100.0% | 99.4%  | TAGGAGCAGTAAATTTTATTACAACCTGTAATTAATATACGATCTCCGGAAATACITTTAGATCGAATACCAATATTTTGTCT   |     |
| 5 An.funestus_H04      | 100.0% | 99.4%  | TAGGAGCAGTAAATTTTATTACAACCTGTAATTAATATACGATCTCCGGAAATACITTTAGATCGAATACCAATATTTTGTCT   |     |
| 6 An.funestus_H05      | 100.0% | 99.4%  | TAGGAGCAGTAAATTTTATTACAACCTGTAATTAATATACGATCTCCGGAAATACITTTAGATCGAATACCAATATTTTGTCT   |     |
| 7 An.funestus_H06      | 100.0% | 99.2%  | TAGGAGCAGTAAATTTTATTACAACCTGTAATTAATATACGATCTCCGGAAATACITTTAGATCGAATACCAATATTTTGTCT   |     |
|                        | cov    | pid    | 481                                                                                   | 560 |
| 1 An.funestus_NC038158 | 100.0% | 100.0% | TGATCTGTAGTAATTAACAGCAATCTTTTATTACCTTTTACCAGTATTAGCTGGAGCTATTACAAATATTATTAAACAGA      |     |
| 2 An.funestus_H01      | 100.0% | 99.5%  | TGATCTGTAGTAATTAACAGCAATCTTTTATTACCTTTTACCAGTATTAGCTGGAGCTATTACAAATATTATTAAACAGA      |     |
| 3 An.funestus_H02      | 100.0% | 99.7%  | TGATCTGTAGTAATTAACAGCAATCTTTTATTACCTTTTACCAGTATTAGCTGGAGCTATTACAAATATTATTAAACAGA      |     |
| 4 An.funestus_H03      | 100.0% | 99.4%  | TGATCTGTAGTAATTAACAGCAATCTTTTATTACCTTTTACCAGTATTAGCTGGAGCTATTACAAATATTATTAAACAGA      |     |
| 5 An.funestus_H04      | 100.0% | 99.4%  | TGATCTGTAGTAATTAACAGCAATCTTTTATTACCTTTTACCAGTATTAGCTGGAGCTATTACAAATATTATTAAACAGA      |     |
| 6 An.funestus_H05      | 100.0% | 99.4%  | TGATCTGTAGTAATTAACAGCAATCTTTTATTACCTTTTACCAGTATTAGCTGGAGCTATTACAAATATTATTAAACAGA      |     |
| 7 An.funestus_H06      | 100.0% | 99.2%  | TGATCTGTAGTAATTAACAGCAATCTTTTATTACCTTTTACCAGTATTAGCTGGAGCTATTACAAATATTATTAAACAGA      |     |
|                        | cov    | pid    | 561                                                                                   | 636 |
| 1 An.funestus_NC038158 | 100.0% | 100.0% | TCGAAATTTAAAACCTTTTTTTTTGATCCGTCAGGAGGAGGAGATCCAAATTTTATATCAACACTTATTATTGATTT         |     |
| 2 An.funestus_H01      | 100.0% | 99.5%  | TCGAAATTTAAAACCTTTTTTTTTGATCCGTCAGGAGGAGGAGATCCAAATTTTATATCAACACTTATTATTGATTT         |     |
| 3 An.funestus_H02      | 100.0% | 99.7%  | TCGAAATTTAAAACCTTTTTTTTTGATCCGTCAGGAGGAGGAGATCCAAATTTTATATCAACACTTATTATTGATTT         |     |
| 4 An.funestus_H03      | 100.0% | 99.4%  | TCGAAATTTAAAACCTTTTTTTTTGATCCGTCAGGAGGAGGAGATCCAAATTTTATATCAACACTTATTATTGATTT         |     |
| 5 An.funestus_H04      | 100.0% | 99.4%  | TCGAAATTTAAAACCTTTTTTTTTGATCCGTCAGGAGGAGGAGATCCAAATTTTATATCAACACTTATTATTGATTT         |     |
| 6 An.funestus_H05      | 100.0% | 99.4%  | TCGAAATTTAAAACCTTTTTTTTTGATCCGTCAGGAGGAGGAGATCCAAATTTTATATCAACACTTATTATTGATTT         |     |
| 7 An.funestus_H06      | 100.0% | 99.2%  | TCGAAATTTAAAACCTTTTTTTTTGATCCGTCAGGAGGAGGAGATCCAAATTTTATATCAACACTTATTATTGATTT         |     |

(e)

Reference sequence (1): An.gambiae\_NC002084  
Identities normalised by aligned length.  
Colored by: identity

|                       | cov    | pid    | 1 [                                                                                  | : | 80 |
|-----------------------|--------|--------|--------------------------------------------------------------------------------------|---|----|
| 1 An.gambiae_NC002084 | 100.0% | 100.0% | GCTGGAAATAGTAGGGACATCTTTAAGAACTCTAAATTCGAGCTGAACTAGGACACCCCTGGAGCAATTTATTGGAGACGATCA |   |    |
| 2 An.gambiae_H01      | 100.0% | 99.4%  | GCTGGAAATAGTAGGGACATCTTTAAGAACTCTAAATTCGAGCTGAACTAGGACACCCCTGGAGCAATTTATTGGAGACGATCA |   |    |
| 3 An.gambiae_H02      | 100.0% | 100.0% | GCTGGAAATAGTAGGGACATCTTTAAGAACTCTAAATTCGAGCTGAACTAGGACACCCCTGGAGCAATTTATTGGAGACGATCA |   |    |
| 4 An.gambiae_H03      | 100.0% | 99.8%  | GCTGGAAATAGTAGGGACATCTTTAAGAACTCTAAATTCGAGCTGAACTAGGACACCCCTGGAGCAATTTATTGGAGACGATCA |   |    |
| 5 An.gambiae_H04      | 100.0% | 99.8%  | GCTGGAAATAGTAGGGACATCTTTAAGAACTCTAAATTCGAGCTGAACTAGGACACCCCTGGAGCAATTTATTGGAGACGATCA |   |    |

  

|                       | cov    | pid    | 81                                                                               | 1 | : | 160 |
|-----------------------|--------|--------|----------------------------------------------------------------------------------|---|---|-----|
| 1 An.gambiae_NC002084 | 100.0% | 100.0% | AAATTTAATAATGTAAACGTTACGCTCATGCTTTTATTATAATTTTCCTTATAGTTATACCTATTATAATGGAGGGTTTG |   |   |     |
| 2 An.gambiae_H01      | 100.0% | 99.4%  | AAATTTAATAATGTAAACGTTACGCTCATGCTTTTATTATAATTTTCCTTATAGTTATACCTATTATAATGGAGGGTTTG |   |   |     |
| 3 An.gambiae_H02      | 100.0% | 100.0% | AAATTTAATAATGTAAACGTTACGCTCATGCTTTTATTATAATTTTCCTTATAGTTATACCTATTATAATGGAGGGTTTG |   |   |     |
| 4 An.gambiae_H03      | 100.0% | 99.8%  | AAATTTAATAATGTAAACGTTACGCTCATGCTTTTATTATAATTTTCCTTATAGTTATACCTATTATAATGGAGGGTTTG |   |   |     |
| 5 An.gambiae_H04      | 100.0% | 99.8%  | AAATTTAATAATGTAAACGTTACGCTCATGCTTTTATTATAATTTTCCTTATAGTTATACCTATTATAATGGAGGGTTTG |   |   |     |

  

|                       | cov    | pid    | 161                                                                      | 2 | : | 240 |
|-----------------------|--------|--------|--------------------------------------------------------------------------|---|---|-----|
| 1 An.gambiae_NC002084 | 100.0% | 100.0% | GAAACTGATTAGTTCCTTTAAATAGGAGCACCGATATAGCTTTTCCGAAATAAATAAAGATTTTGAATGCTT |   |   |     |
| 2 An.gambiae_H01      | 100.0% | 99.4%  | GAAACTGATTAGTTCCTTTAAATAGGAGCACCGATATAGCTTTTCCGAAATAAATAAAGATTTTGAATGCTT |   |   |     |
| 3 An.gambiae_H02      | 100.0% | 100.0% | GAAACTGATTAGTTCCTTTAAATAGGAGCACCGATATAGCTTTTCCGAAATAAATAAAGATTTTGAATGCTT |   |   |     |
| 4 An.gambiae_H03      | 100.0% | 99.8%  | GAAACTGATTAGTTCCTTTAAATAGGAGCACCGATATAGCTTTTCCGAAATAAATAAAGATTTTGAATGCTT |   |   |     |
| 5 An.gambiae_H04      | 100.0% | 99.8%  | GAAACTGATTAGTTCCTTTAAATAGGAGCACCGATATAGCTTTTCCGAAATAAATAAAGATTTTGAATGCTT |   |   |     |

  

|                       | cov    | pid    | 241                                                                        | 3 | : | 320 |
|-----------------------|--------|--------|----------------------------------------------------------------------------|---|---|-----|
| 1 An.gambiae_NC002084 | 100.0% | 100.0% | CCCTCTCATTAAACACTTTTAAATTCAGTAGTATAGTAGAAAAAGGGGCTGGAAAGGATGAAGTGTATCCCTCT |   |   |     |
| 2 An.gambiae_H01      | 100.0% | 99.4%  | CCCTCTCATTAAACACTTTTAAATTCAGTAGTATAGTAGAAAAAGGGGCTGGAAAGGATGAAGTGTATCCCTCT |   |   |     |
| 3 An.gambiae_H02      | 100.0% | 100.0% | CCCTCTCATTAAACACTTTTAAATTCAGTAGTATAGTAGAAAAAGGGGCTGGAAAGGATGAAGTGTATCCCTCT |   |   |     |
| 4 An.gambiae_H03      | 100.0% | 99.8%  | CCCTCTCATTAAACACTTTTAAATTCAGTAGTATAGTAGAAAAAGGGGCTGGAAAGGATGAAGTGTATCCCTCT |   |   |     |
| 5 An.gambiae_H04      | 100.0% | 99.8%  | CCCTCTCATTAAACACTTTTAAATTCAGTAGTATAGTAGAAAAAGGGGCTGGAAAGGATGAAGTGTATCCCTCT |   |   |     |

  

|                       | cov    | pid    | 321                                                                              | 4 | : | 400 |
|-----------------------|--------|--------|----------------------------------------------------------------------------------|---|---|-----|
| 1 An.gambiae_NC002084 | 100.0% | 100.0% | ATCTTCGGAAATGCTCATGCTGGAGCTTCAGTAGATTTAGCAAATTTTTCTCTTCAATTTAGCAGGAAATTTCTCTATTT |   |   |     |
| 2 An.gambiae_H01      | 100.0% | 99.4%  | ATCTTCGGAAATGCTCATGCTGGAGCTTCAGTAGATTTAGCAAATTTTTCTCTTCAATTTAGCAGGAAATTTCTCTATTT |   |   |     |
| 3 An.gambiae_H02      | 100.0% | 100.0% | ATCTTCGGAAATGCTCATGCTGGAGCTTCAGTAGATTTAGCAAATTTTTCTCTTCAATTTAGCAGGAAATTTCTCTATTT |   |   |     |
| 4 An.gambiae_H03      | 100.0% | 99.8%  | ATCTTCGGAAATGCTCATGCTGGAGCTTCAGTAGATTTAGCAAATTTTTCTCTTCAATTTAGCAGGAAATTTCTCTATTT |   |   |     |
| 5 An.gambiae_H04      | 100.0% | 99.8%  | ATCTTCGGAAATGCTCATGCTGGAGCTTCAGTAGATTTAGCAAATTTTTCTCTTCAATTTAGCAGGAAATTTCTCTATTT |   |   |     |

  

|                       | cov    | pid    | 401                                                                             | : | 480 |  |
|-----------------------|--------|--------|---------------------------------------------------------------------------------|---|-----|--|
| 1 An.gambiae_NC002084 | 100.0% | 100.0% | TAGGAGCAGTAAATTTTATTACAACAGTAAATAATAACGGTCTCCAGGAAATACATAGATCGAAATACCATTTATTGTT |   |     |  |
| 2 An.gambiae_H01      | 100.0% | 99.4%  | TAGGAGCAGTAAATTTTATTACAACAGTAAATAATAACGGTCTCCAGGAAATACATAGATCGAAATACCATTTATTGTT |   |     |  |
| 3 An.gambiae_H02      | 100.0% | 100.0% | TAGGAGCAGTAAATTTTATTACAACAGTAAATAATAACGGTCTCCAGGAAATACATAGATCGAAATACCATTTATTGTT |   |     |  |
| 4 An.gambiae_H03      | 100.0% | 99.8%  | TAGGAGCAGTAAATTTTATTACAACAGTAAATAATAACGGTCTCCAGGAAATACATAGATCGAAATACCATTTATTGTT |   |     |  |
| 5 An.gambiae_H04      | 100.0% | 99.8%  | TAGGAGCAGTAAATTTTATTACAACAGTAAATAATAACGGTCTCCAGGAAATACATAGATCGAAATACCATTTATTGTT |   |     |  |

  

|                       | cov    | pid    | 481                                                                      | 5 | : | 560 |
|-----------------------|--------|--------|--------------------------------------------------------------------------|---|---|-----|
| 1 An.gambiae_NC002084 | 100.0% | 100.0% | TGATCGGTAGTTATTACAGCAGTATTATTATTATCAITACCAGTATTAGCAGGAGCATTAATAATTAACTGA |   |   |     |
| 2 An.gambiae_H01      | 100.0% | 99.4%  | TGATCGGTAGTTATTACAGCAGTATTATTATTATCAITACCAGTATTAGCAGGAGCATTAATAATTAACTGA |   |   |     |
| 3 An.gambiae_H02      | 100.0% | 100.0% | TGATCGGTAGTTATTACAGCAGTATTATTATTATCAITACCAGTATTAGCAGGAGCATTAATAATTAACTGA |   |   |     |
| 4 An.gambiae_H03      | 100.0% | 99.8%  | TGATCGGTAGTTATTACAGCAGTATTATTATTATCAITACCAGTATTAGCAGGAGCATTAATAATTAACTGA |   |   |     |
| 5 An.gambiae_H04      | 100.0% | 99.8%  | TGATCGGTAGTTATTACAGCAGTATTATTATTATCAITACCAGTATTAGCAGGAGCATTAATAATTAACTGA |   |   |     |

  

|                       | cov    | pid    | 561                                                                         | 6 | ] | 636 |
|-----------------------|--------|--------|-----------------------------------------------------------------------------|---|---|-----|
| 1 An.gambiae_NC002084 | 100.0% | 100.0% | TCGAAAATTTAAATACATCTTTCTTTGATCCAGCAGGAGGAGGTGATCCAAATTTTATCAACACATTTCTGATTT |   |   |     |
| 2 An.gambiae_H01      | 100.0% | 99.4%  | TCGAAAATTTAAATACATCTTTCTTTGATCCAGCAGGAGGAGGTGATCCAAATTTTATCAACACATTTCTGATTT |   |   |     |
| 3 An.gambiae_H02      | 100.0% | 100.0% | TCGAAAATTTAAATACATCTTTCTTTGATCCAGCAGGAGGAGGTGATCCAAATTTTATCAACACATTTCTGATTT |   |   |     |
| 4 An.gambiae_H03      | 100.0% | 99.8%  | TCGAAAATTTAAATACATCTTTCTTTGATCCAGCAGGAGGAGGTGATCCAAATTTTATCAACACATTTCTGATTT |   |   |     |
| 5 An.gambiae_H04      | 100.0% | 99.8%  | TCGAAAATTTAAATACATCTTTCTTTGATCCAGCAGGAGGAGGTGATCCAAATTTTATCAACACATTTCTGATTT |   |   |     |

(f)

Reference sequence (1): An.sp.D\_MK047667  
Identities normalised by aligned length.  
Colored by: identity

|    |                  | cov    | pid    | 1       | 1          | 80        |
|----|------------------|--------|--------|---------|------------|-----------|
| 1  | An.sp.D_MK047667 | 100.0% | 100.0% | GCAGGAA | AGTAGGAACA | CATTAAGAA |
| 2  | An.sp.F_MK047669 | 100.0% | 98.9%  | GCAGGAA | AGTAGGAACA | CATTAAGAA |
| 3  | An.sp.C_MK047666 | 100.0% | 99.1%  | GCAGGAA | AGTAGGAACA | CATTAAGAA |
| 4  | An.sp.17_H01     | 100.0% | 98.6%  | GCAGGAA | AGTAGGAACA | CATTAAGAA |
| 5  | An.sp.17_H02     | 100.0% | 99.2%  | GCAGGAA | AGTAGGAACA | CATTAAGAA |
| 6  | An.sp.17_H03     | 100.0% | 99.4%  | GCAGGAA | AGTAGGAACA | CATTAAGAA |
| 7  | An.sp.17_H04     | 100.0% | 98.6%  | GCAGGAA | AGTAGGAACA | CATTAAGAA |
| 8  | An.sp.17_H05     | 100.0% | 99.8%  | GCAGGAA | AGTAGGAACA | CATTAAGAA |
| 9  | An.sp.17_H06     | 100.0% | 99.1%  | GCAGGAA | AGTAGGAACA | CATTAAGAA |
| 10 | An.sp.17_H07     | 100.0% | 99.4%  | GCAGGAA | AGTAGGAACA | CATTAAGAA |
| 11 | An.sp.17_H08     | 100.0% | 99.7%  | GCAGGAA | AGTAGGAACA | CATTAAGAA |
| 12 | An.sp.17_H09     | 100.0% | 99.5%  | GCAGGAA | AGTAGGAACA | CATTAAGAA |
| 13 | An.sp.17_H10     | 100.0% | 99.5%  | GCAGGAA | AGTAGGAACA | CATTAAGAA |
| 14 | An.sp.17_H11     | 100.0% | 98.9%  | GCAGGAA | AGTAGGAACA | CATTAAGAA |
| 15 | An.sp.17_H12     | 100.0% | 99.5%  | GCAGGAA | AGTAGGAACA | CATTAAGAA |
| 16 | An.sp.17_H13     | 100.0% | 98.9%  | GCAGGAA | AGTAGGAACA | CATTAAGAA |

|    |                  | cov    | pid    | 81      | 1        | 160       |
|----|------------------|--------|--------|---------|----------|-----------|
| 1  | An.sp.D_MK047667 | 100.0% | 100.0% | AAATTTA | AATGTAAT | GTTACTGCT |
| 2  | An.sp.F_MK047669 | 100.0% | 98.9%  | AAATTTA | AATGTAAT | GTTACTGCT |
| 3  | An.sp.C_MK047666 | 100.0% | 99.1%  | AAATTTA | AATGTAAT | GTTACTGCT |
| 4  | An.sp.17_H01     | 100.0% | 98.6%  | AAATTTA | AATGTAAT | GTTACTGCT |
| 5  | An.sp.17_H02     | 100.0% | 99.2%  | AAATTTA | AATGTAAT | GTTACTGCT |
| 6  | An.sp.17_H03     | 100.0% | 99.4%  | AAATTTA | AATGTAAT | GTTACTGCT |
| 7  | An.sp.17_H04     | 100.0% | 98.6%  | AAATTTA | AATGTAAT | GTTACTGCT |
| 8  | An.sp.17_H05     | 100.0% | 99.8%  | AAATTTA | AATGTAAT | GTTACTGCT |
| 9  | An.sp.17_H06     | 100.0% | 99.1%  | AAATTTA | AATGTAAT | GTTACTGCT |
| 10 | An.sp.17_H07     | 100.0% | 99.4%  | AAATTTA | AATGTAAT | GTTACTGCT |
| 11 | An.sp.17_H08     | 100.0% | 99.7%  | AAATTTA | AATGTAAT | GTTACTGCT |
| 12 | An.sp.17_H09     | 100.0% | 99.5%  | AAATTTA | AATGTAAT | GTTACTGCT |
| 13 | An.sp.17_H10     | 100.0% | 99.5%  | AAATTTA | AATGTAAT | GTTACTGCT |
| 14 | An.sp.17_H11     | 100.0% | 98.9%  | AAATTTA | AATGTAAT | GTTACTGCT |
| 15 | An.sp.17_H12     | 100.0% | 99.5%  | AAATTTA | AATGTAAT | GTTACTGCT |
| 16 | An.sp.17_H13     | 100.0% | 98.9%  | AAATTTA | AATGTAAT | GTTACTGCT |

|    |                  | cov    | pid    | 161    | 2       | 240     |
|----|------------------|--------|--------|--------|---------|---------|
| 1  | An.sp.D_MK047667 | 100.0% | 100.0% | GAAATT | GACTTGT | CCCTTAA |
| 2  | An.sp.F_MK047669 | 100.0% | 98.9%  | GAAATT | GACTTGT | CCCTTAA |
| 3  | An.sp.C_MK047666 | 100.0% | 99.1%  | GAAATT | GACTTGT | CCCTTAA |
| 4  | An.sp.17_H01     | 100.0% | 98.6%  | GAAATT | GACTTGT | CCCTTAA |
| 5  | An.sp.17_H02     | 100.0% | 99.2%  | GAAATT | GACTTGT | CCCTTAA |
| 6  | An.sp.17_H03     | 100.0% | 99.4%  | GAAATT | GACTTGT | CCCTTAA |
| 7  | An.sp.17_H04     | 100.0% | 98.6%  | GAAATT | GACTTGT | CCCTTAA |
| 8  | An.sp.17_H05     | 100.0% | 99.8%  | GAAATT | GACTTGT | CCCTTAA |
| 9  | An.sp.17_H06     | 100.0% | 99.1%  | GAAATT | GACTTGT | CCCTTAA |
| 10 | An.sp.17_H07     | 100.0% | 99.4%  | GAAATT | GACTTGT | CCCTTAA |
| 11 | An.sp.17_H08     | 100.0% | 99.7%  | GAAATT | GACTTGT | CCCTTAA |
| 12 | An.sp.17_H09     | 100.0% | 99.5%  | GAAATT | GACTTGT | CCCTTAA |
| 13 | An.sp.17_H10     | 100.0% | 99.5%  | GAAATT | GACTTGT | CCCTTAA |
| 14 | An.sp.17_H11     | 100.0% | 98.9%  | GAAATT | GACTTGT | CCCTTAA |
| 15 | An.sp.17_H12     | 100.0% | 99.5%  | GAAATT | GACTTGT | CCCTTAA |
| 16 | An.sp.17_H13     | 100.0% | 98.9%  | GAAATT | GACTTGT | CCCTTAA |

|    |                  | cov    | pid    | 241    | 3       | 320     |
|----|------------------|--------|--------|--------|---------|---------|
| 1  | An.sp.D_MK047667 | 100.0% | 100.0% | CCCCCT | CTTTAAC | CTTCTTA |
| 2  | An.sp.F_MK047669 | 100.0% | 98.9%  | CCCCCT | CTTTAAC | CTTCTTA |
| 3  | An.sp.C_MK047666 | 100.0% | 99.1%  | CCCCCT | CTTTAAC | CTTCTTA |
| 4  | An.sp.17_H01     | 100.0% | 98.6%  | CCCCCT | CTTTAAC | CTTCTTA |
| 5  | An.sp.17_H02     | 100.0% | 99.2%  | CCCCCT | CTTTAAC | CTTCTTA |
| 6  | An.sp.17_H03     | 100.0% | 99.4%  | CCCCCT | CTTTAAC | CTTCTTA |
| 7  | An.sp.17_H04     | 100.0% | 98.6%  | CCCCCT | CTTTAAC | CTTCTTA |
| 8  | An.sp.17_H05     | 100.0% | 99.8%  | CCCCCT | CTTTAAC | CTTCTTA |
| 9  | An.sp.17_H06     | 100.0% | 99.1%  | CCCCCT | CTTTAAC | CTTCTTA |
| 10 | An.sp.17_H07     | 100.0% | 99.4%  | CCCCCT | CTTTAAC | CTTCTTA |
| 11 | An.sp.17_H08     | 100.0% | 99.7%  | CCCCCT | CTTTAAC | CTTCTTA |
| 12 | An.sp.17_H09     | 100.0% | 99.5%  | CCCCCT | CTTTAAC | CTTCTTA |
| 13 | An.sp.17_H10     | 100.0% | 99.5%  | CCCCCT | CTTTAAC | CTTCTTA |
| 14 | An.sp.17_H11     | 100.0% | 98.9%  | CCCCCT | CTTTAAC | CTTCTTA |
| 15 | An.sp.17_H12     | 100.0% | 99.5%  | CCCCCT | CTTTAAC | CTTCTTA |
| 16 | An.sp.17_H13     | 100.0% | 98.9%  | CCCCCT | CTTTAAC | CTTCTTA |

|   |                  | cov    | pid    | 321    | 4     | 400    |
|---|------------------|--------|--------|--------|-------|--------|
| 1 | An.sp.D_MK047667 | 100.0% | 100.0% | ATCTTC | TGGAA | TGCTCA |
